# Supplementary material
Source: Springer Nature journal article supplement (http://www.springermedizin.de/resource/supplementary/13054_2009_8416_MOESM4_ESM.pdf/9731912)

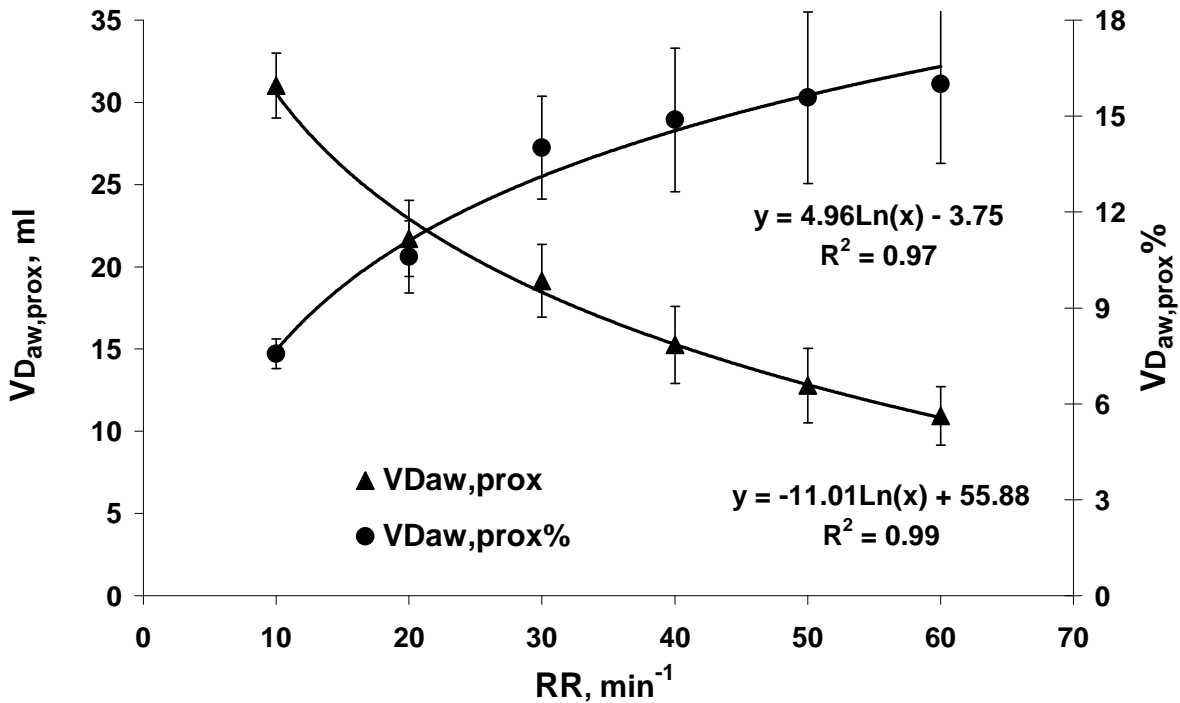

Supplement: MOESM4 [file 9731912]
